# Supplementary material
Source: PubMed Central journal article supplement (PMC3055701)
Supplement: 97320630005250S1.pdf [file 97320630005250S1.pdf]

## Supplementary material:

**Table 1:** Energies of docking results calculated using Autodock 4.0.

| Ligand                                                                | Standard | CKRKC  | CRGRC  | CRTRC  | CGRRC  | CKRRC  | CRRKC  | CTRRC  |
|-----------------------------------------------------------------------|----------|--------|--------|--------|--------|--------|--------|--------|
| Estimated free energy of binding, $\Delta G_{\text{bind}}$ (kcal/mol) | -6.14    | -8.39  | -7.35  | -7.06  | -7.04  | -7.01  | -6.83  | -6.15  |
| Estimated inhibition constant, $K_i$ ( $\mu\text{M}$ )                | 31.54    | 0.707  | 4.12   | 6.66   | 6.96   | 7.32   | 9.83   | 30.9   |
| Docking energy (kcal/mol)                                             | -14.33   | -13.59 | -10.94 | -11.15 | -10.81 | -11.72 | -11.81 | -10.37 |
| Final intermolecular energy (kcal/mol)                                | -11.63   | -11.32 | -10.18 | -9.98  | -8.51  | -10.16 | -8.73  | -8.85  |
| Final internal energy of ligand (kcal/mol)                            | -2.70    | -2.27  | -0.76  | -1.17  | -2.3   | -1.56  | -3.08  | -1.52  |
| Torsional free energy, (kcal/mol)                                     | 6.86     | 4.39   | 2.74   | 3.29   | 2.74   | 4.12   | 4.12   | 3.29   |
| Rotatable bonds                                                       | 34       | 18     | 15     | 17     | 15     | 20     | 19     | 16     |

**Table 2:** Residues in the active site of DEN-2 NS3-NS2B protease that form hydrogen bond with the standard ligand and ligand CKRKC. Catalytic triads are shown in boldface.

| Residue      | Standard Ligand | Ligand CKRKC |
|--------------|-----------------|--------------|
| Ile36        | √               | √            |
| <b>His51</b> | √               | √            |
| Val52        | √               |              |
| Lys73        | √               | √            |
| <b>Asp75</b> |                 | √            |
| Leu128       |                 | √            |
| Phe130       | √               | √            |
| Ser131       | √               | √            |
| Pro132       | √               | √            |
| Asn152       | √               | √            |

**Table 3:** List of contact residues in the active site of DEN-2 NS3-NS2B protease that interact with the standard ligand and ligand CKRKC. Catalytic triads are shown in bold letter.

| Residue       | Standard Ligand | Ligand CKRKC |
|---------------|-----------------|--------------|
| Ile36         | √               | √            |
| Trp50         | √               |              |
| <b>His51</b>  | √               | √            |
| Val52         | √               | √            |
| Arg54         |                 | √            |
| Lys73         | √               | √            |
| Lys74         |                 | √            |
| <b>Asp75</b>  | √               | √            |
| Leu128        | √               | √            |
| Phe130        | √               | √            |
| Ser131        | √               | √            |
| Pro132        | √               | √            |
| <b>Ser135</b> | √               | √            |
| Tyr150        |                 | √            |
| Gly151        | √               |              |
| Asn152        | √               | √            |
| Gly153        | √               | √            |
| Val154        | √               | √            |
